# Supplementary material for: Superior ab initio identification, annotation and characterisation of TEs and segmental duplications from genome assemblies
Source: PubMed Central journal article supplement (PMC5851578; doi:10.1371/journal.pone.0193588), 2018-03-14
Supplement: pone.0193588.s001.pdf [file pone.0193588.s001.pdf]

# Anolis

Unclassified family024732

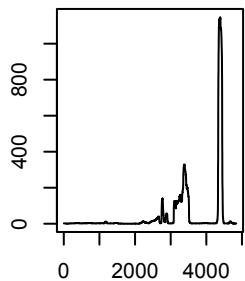

Unclassified family033560

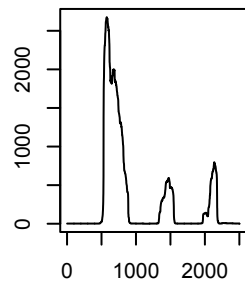

Unclassified family034443

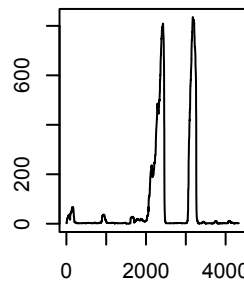

Unclassified family036719

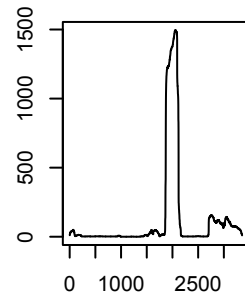

Unclassified family037558

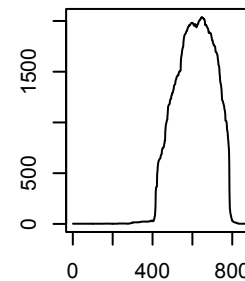

Unclassified family037671

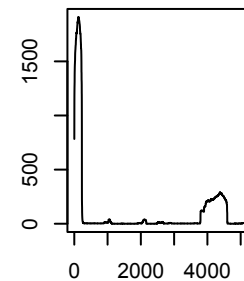

Unclassified family044101

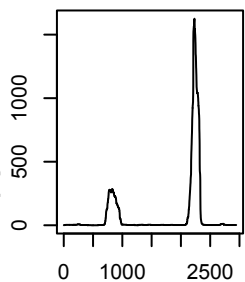

Unclassified family045985

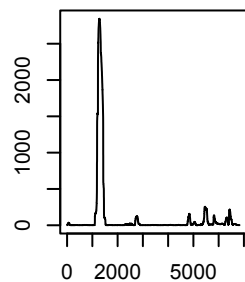

Unclassified family059548

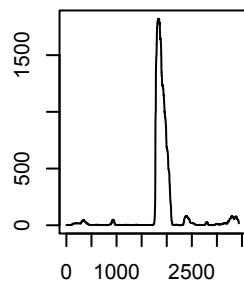

Unclassified family059985

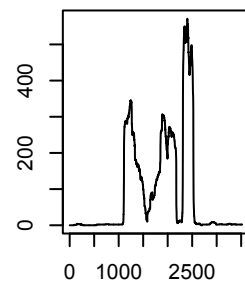

Unclassified family061389

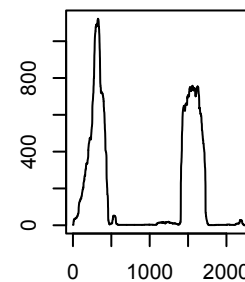

Unclassified family063697

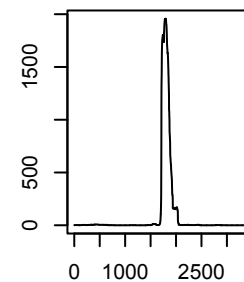

Copy number

Unclassified family067602

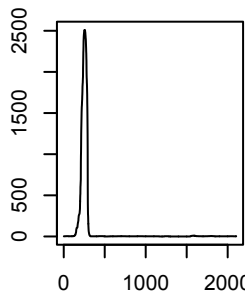

Unclassified family071574

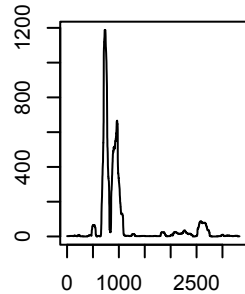

Unclassified family072006

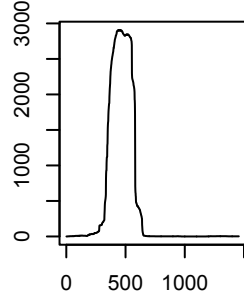

Unclassified family073631

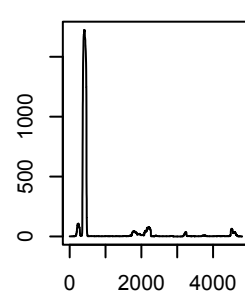

Unclassified family077299

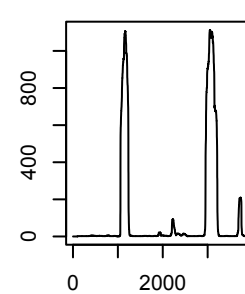

Sequence position
