# Supplementary material for: Superior ab initio identification, annotation and characterisation of TEs and segmental duplications from genome assemblies
Source: PubMed Central journal article supplement (PMC5851578; doi:10.1371/journal.pone.0193588), 2018-03-14
Supplement: pone.0193588.s002.pdf [file pone.0193588.s002.pdf]

# Opossum

Unclassified family015099

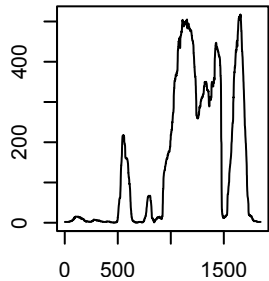

Unclassified family024613

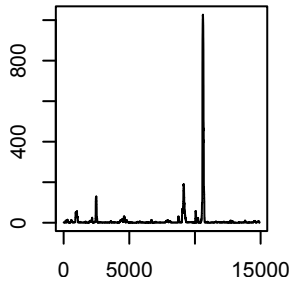

Unclassified family024636

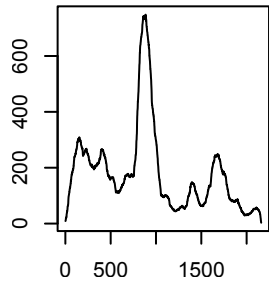

Unclassified family025775

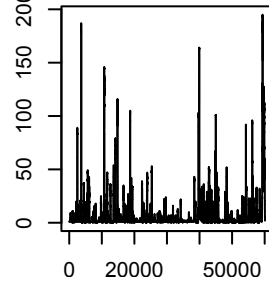

Unclassified family026811

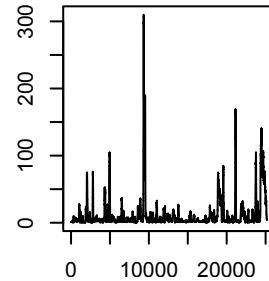

Unclassified family031183

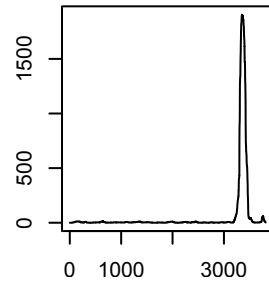

Unclassified family031860

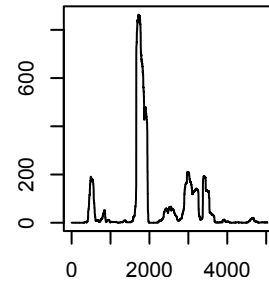

Unclassified family032010

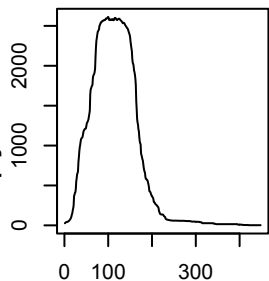

Unclassified family052389

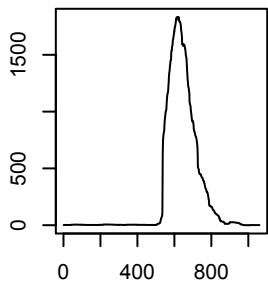

Unclassified family052853

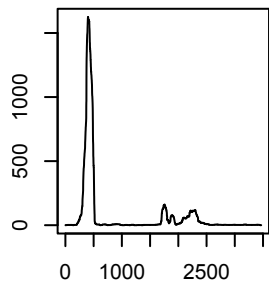

Unclassified family053760

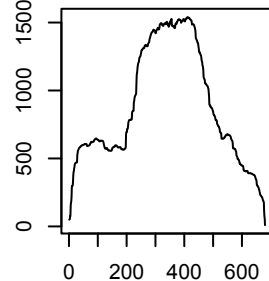

Unclassified family059447

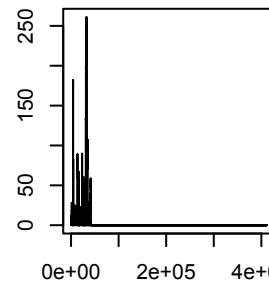

Unclassified family059530

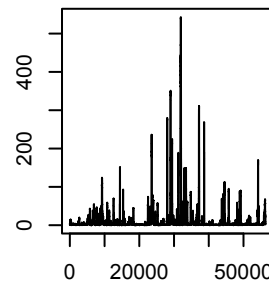

Unclassified family059947

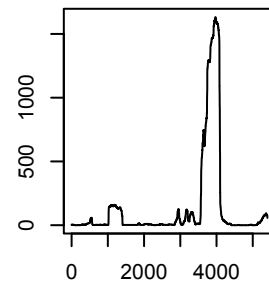

Unclassified family060256

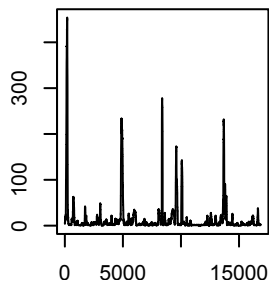

Unclassified family060293

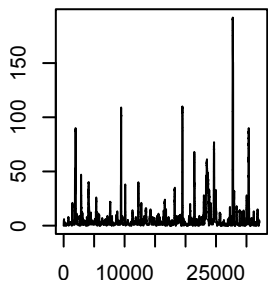

Unclassified family060429

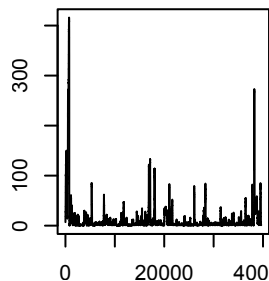

Unclassified family065581

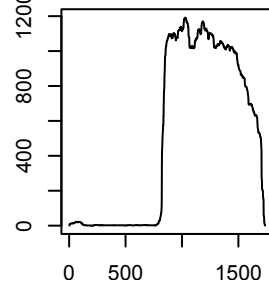

Unclassified family067900

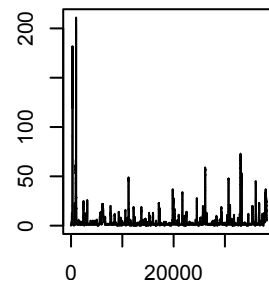

Unclassified family073440

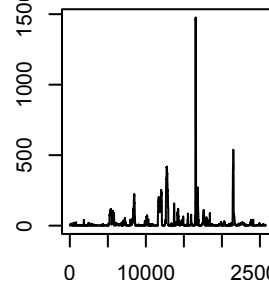

Unclassified family073839

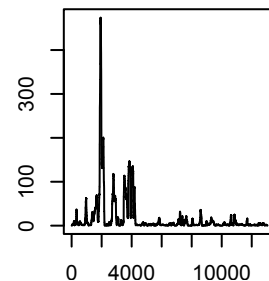

Sequence position

Copy number
