# Supplementary material for: Superior ab initio identification, annotation and characterisation of TEs and segmental duplications from genome assemblies
Source: PubMed Central journal article supplement (PMC5851578; doi:10.1371/journal.pone.0193588), 2018-03-14

# Human Coverage plot of unclassified family014307

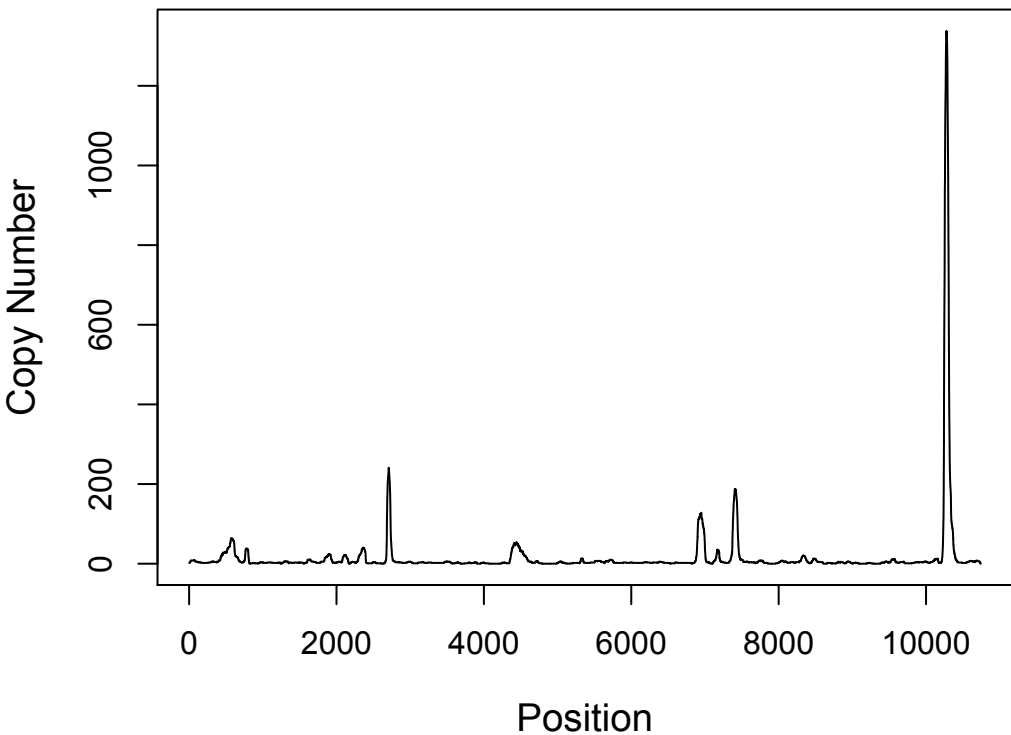

Supplement: pone.0193588.s003.pdf [file pone.0193588.s003.pdf]
