# Supplementary material for: Superior ab initio identification, annotation and characterisation of TEs and segmental duplications from genome assemblies
Source: PubMed Central journal article supplement (PMC5851578; doi:10.1371/journal.pone.0193588), 2018-03-14
Supplement: pone.0193588.s005.pdf [file pone.0193588.s005.pdf]

| No | Systematic Name                 | Common Name    | Genome Version        | Source | Submitter |
|----|---------------------------------|----------------|-----------------------|--------|-----------|
| 1  | <i>Homo sapiens</i>             | Human          | GRCh37(hg19)          | NCBI   | GRC       |
| 2  | <i>Central Pogona Vitticeps</i> | Bearded Dragon | Pogona_vitticeps.male | NCBI   | BRAEMBL   |
| 3  | <i>Anolis Carolinensis</i>      | Anolis lizard  | PanoCar2              | NCBI   | Broad     |
| 4  | <i>Gallus gallus</i>            | Chicken        | galGal4               | NCBI   | ICGS      |
| 5  | <i>Monodelphis domestica</i>    | Opossum        | monDom5               | NCBI   | GAT       |
| 6  | <i>Ornithorhynchus anatinus</i> | Platypus       | ornAna1               | NCBI   | WashU     |

The Following abbreviations are used for submitters:

Genome Sequencing Platform, The Genome Assembly Team = GAT;

Genome Reference Consortium = GRC;

International Chicken Genome Consortium = ICGS;

Washington University = WashU.
