# Supplementary material for: Superior ab initio identification, annotation and characterisation of TEs and segmental duplications from genome assemblies
Source: PubMed Central journal article supplement (PMC5851578; doi:10.1371/journal.pone.0193588), 2018-03-14
Supplement: pone.0193588.s006.pdf [file pone.0193588.s006.pdf]

---

| No | Species                         | Total Sequence Length | Scaffold N50 | Contig N50 | Assemble Level |
|----|---------------------------------|-----------------------|--------------|------------|----------------|
| 1  | <i>Homo sapiens</i>             | 3,095,677,412         | 44,983,201   | 38,440,852 | Chromosome     |
| 2  | <i>Pogona Vitticeps</i>         | 1,716,675,060         | 2,477,614    | -          | Scaffold       |
| 3  | <i>Anolis Carolinensis</i>      | 1,799,143,587         | 4,033,265    | 79,867     | Chromosome     |
| 4  | <i>Gallus gallus</i>            | 1,046,932,099         | 12,877,381   | 279,750    | Chromosome     |
| 5  | <i>Monodelphis domestica</i>    | 3,605,631,728         | 59,809,810   | 108,014    | Chromosome     |
| 6  | <i>Ornithorhynchus anatinus</i> | 2,073,148,626         | 958,970      | 11,554     | Chromosome     |

---
