# Supplementary material for: Superior ab initio identification, annotation and characterisation of TEs and segmental duplications from genome assemblies
Source: PubMed Central journal article supplement (PMC5851578; doi:10.1371/journal.pone.0193588), 2018-03-14
Supplement: pone.0193588.s007.pdf [file pone.0193588.s007.pdf]

| No | Species                         | Assembly Method       | Sequencing Technology                            | Genome Coverage |
|----|---------------------------------|-----------------------|--------------------------------------------------|-----------------|
| 1  | <i>Homo sapiens</i>             | Celera                | Sanger                                           | 20x             |
| 2  | <i>Pogona Vitticeps</i>         | SOAP deNovo           | Illumina HiSeq 2000                              | 85.5x           |
| 3  | <i>Anolis Carolinensis</i>      | Arachne v.3.0.0       | ABI                                              | 7.10x           |
| 4  | <i>Gallus gallus</i>            | Celera Assemblerv.5.4 | Sanger; 454                                      | 12x             |
| 5  | <i>Monodelphis domestica</i>    | ARACHNE2+             | Sanger                                           | 6.8x            |
| 6  | <i>Ornithorhynchus anatinus</i> | PCAP                  | WGS plasmid, fosmid end<br>and BAC end sequences | 6x              |
