# Supplementary material for: Superior ab initio identification, annotation and characterisation of TEs and segmental duplications from genome assemblies
Source: PubMed Central journal article supplement (PMC5851578; doi:10.1371/journal.pone.0193588), 2018-03-14
Supplement: pone.0193588.s008.pdf [file pone.0193588.s008.pdf]

|                   | Chicken        |     | Bearded dragon |     | Anolis         |     | Platypus       |     | Opossum        |     | Human          |     |
|-------------------|----------------|-----|----------------|-----|----------------|-----|----------------|-----|----------------|-----|----------------|-----|
|                   | <i>De novo</i> | RMD | <i>De novo</i> | RMD | <i>De novo</i> | RMD | <i>De novo</i> | RMD | <i>De novo</i> | RMD | <i>De novo</i> | RMD |
| Time consumed (h) | 37             | 8   | 276            | 39  | 266            | 19  | 434            | 49  | 244            | 21  | 495            | 18  |
