# Supplementary material for: Superior ab initio identification, annotation and characterisation of TEs and segmental duplications from genome assemblies
Source: PubMed Central journal article supplement (PMC5851578; doi:10.1371/journal.pone.0193588), 2018-03-14
Supplement: pone.0193588.s009.pdf [file pone.0193588.s009.pdf]

|                | <b>Chicken</b> |         | <b>Bearded dragon</b> |         | <b>Anolis</b> |         | <b>Platypus</b> |         | <b>Opossum</b> |         | <b>Human</b> |         |
|----------------|----------------|---------|-----------------------|---------|---------------|---------|-----------------|---------|----------------|---------|--------------|---------|
|                | CARP           | RMD     | CARP                  | RMD     | CARP          | RMD     | CARP            | RMD     | CARP           | RMD     | CARP         | RMD     |
| Well-annotated | 4,100,530      | 154,743 | 6,758,949             | 396,987 | 21,498,947    | 564,031 | 4,022,323       | 204,475 | 28,379,922     | 651,545 | 10,914,900   | 462,921 |
| Unclassified   | 10,871,250     | 20,553  | 42,128,582            | 220,612 | 34,790,047    | 166,735 | 142,361,947     | 40,446  | 25,672,894     | 66,497  | 20,779,056   | 2,018   |
| Total          | 14,971,780     | 175,296 | 48,887,531            | 617,599 | 56,288,994    | 730,766 | 146,384,270     | 244,921 | 54,052,816     | 718,042 | 31,693,956   | 464,939 |
