# Supplementary material for: Superior ab initio identification, annotation and characterisation of TEs and segmental duplications from genome assemblies
Source: PubMed Central journal article supplement (PMC5851578; doi:10.1371/journal.pone.0193588), 2018-03-14
Supplement: pone.0193588.s010.pdf [file pone.0193588.s010.pdf]

|        | <b>Chicken</b> |         | <b>Bearded dragon</b> |         | <b>Anolis</b> |         | <b>Platypus</b> |         | <b>Opossum</b> |         | <b>Human</b> |         |
|--------|----------------|---------|-----------------------|---------|---------------|---------|-----------------|---------|----------------|---------|--------------|---------|
|        | CARP           | RMD     | CARP                  | RMD     | CARP          | RMD     | CARP            | RMD     | CARP           | RMD     | CARP         | RMD     |
| SINE   | 0              | 542     | 438,341               | 13,932  | 705,660       | 14,210  | 620,446         | 42,051  | 217,725        | 43,274  | 3,516,601    | 21,660  |
| LINE   | 2,504,529      | 71,746  | 5,710,722             | 217,145 | 13,287,702    | 288,130 | 2,803,327       | 101,511 | 17,085,608     | 364,368 | 5,115,349    | 249,096 |
| LTR    | 1,364,464      | 56,279  | 125,606               | 78,822  | 4,034,353     | 121,054 | 170,087         | 24,980  | 10,832,916     | 212,088 | 2,028,463    | 134,103 |
| DNA    | 31,724         | 9,635   | 480,443               | 79,404  | 3,461,618     | 120,828 | 20,525          | 14,770  | 230,518        | 25,880  | 76,177       | 42,308  |
| Others | 199,813        | 16,541  | 3,837                 | 7,684   | 9,614         | 19,809  | 407,938         | 21,163  | 13,155         | 5,935   | 178,310      | 15,754  |
| Total  | 4,100,530      | 154,743 | 6,758,949             | 396,987 | 21,498,947    | 564,031 | 4,022,323       | 204,475 | 28,379,922     | 651,545 | 10,914,900   | 462,921 |
