# Supplementary material for: Superior ab initio identification, annotation and characterisation of TEs and segmental duplications from genome assemblies
Source: PubMed Central journal article supplement (PMC5851578; doi:10.1371/journal.pone.0193588), 2018-03-14
Supplement: pone.0193588.s011.pdf [file pone.0193588.s011.pdf]

| Group                           | Copy number | Total bp    | Percentage coverage of genome |
|---------------------------------|-------------|-------------|-------------------------------|
| <b>Non-LTR retrotransposons</b> |             |             |                               |
| <b>LINES</b>                    |             |             |                               |
| CR1                             | 263,953     | 75,352,619  | 7.197                         |
| Tx1                             | 19,284      | 1,282,829   | 0.123                         |
| LINE L2                         | 10,268      | 991,208     | 0.094                         |
| SINE                            | 9,766       | 957,771     | 0.092                         |
| Others                          | 46,883      | 3,327,936   | 0.318                         |
|                                 | 350,154     | 81,912,363  | 7.824                         |
| <b>DNA transposons</b>          |             |             |                               |
| hAT                             | 64,915      | 5,762,565   | 0.550                         |
| Mariner                         | 35,785      | 5,210,866   | 0.498                         |
| Charlia                         | 9,267       | 3,941,040   | 0.376                         |
| DNA                             | 37,393      | 3,612,850   | 0.345                         |
| Others                          | 120,170     | 8,667,690   | 0.828                         |
|                                 | 267,530     | 27,195,011  | 2.597                         |
| <b>LTR</b>                      |             |             |                               |
| Copia                           | 139,422     | 9,641,970   | 0.921                         |
| Gypsy                           | 32,502      | 2,180,147   | 0.208                         |
| BEL                             | 23,661      | 1,450,356   | 0.138                         |
| Others                          | 26,536      | 3,756,055   | 0.359                         |
|                                 | 222,121     | 17,028,528  | 1.626                         |
| <b>ERVs</b>                     |             |             |                               |
| GGLTR                           | 18,844      | 7,093,568   | 0.677                         |
| Others                          | 72,068      | 11,146,021  | 1.065                         |
|                                 | 90,912      | 18,239,589  | 1.742                         |
| SSR                             | 38,969      | 4,172,125   | 0.399                         |
| Others                          | 112,310     | 11,734,743  | 1.121                         |
| <b>Well-annotated</b>           | 1,081,996   | 160,282,359 | 15.309                        |
| <b>Unknown</b>                  | 84,926      | 20,806,411  | 1.987                         |
| <b>Total</b>                    | 1,166,922   | 181,088,770 | 17.296                        |
