# Supplementary material for: Superior ab initio identification, annotation and characterisation of TEs and segmental duplications from genome assemblies
Source: PubMed Central journal article supplement (PMC5851578; doi:10.1371/journal.pone.0193588), 2018-03-14
Supplement: pone.0193588.s012.pdf [file pone.0193588.s012.pdf]

| Group                           | Copy number | Total bp    | Percentage coverage of genome |
|---------------------------------|-------------|-------------|-------------------------------|
| <b>Non-LTR retrotransposons</b> |             |             |                               |
| <b>LINEs</b>                    |             |             |                               |
| CR1                             | 206,414     | 58,082,752  | 3.228                         |
| LINE L2                         | 282,443     | 75,470,209  | 4.195                         |
| LINE L1                         | 159,992     | 35,267,057  | 1.960                         |
| RTE                             | 97,078      | 32,188,630  | 1.789                         |
| R4                              | 65,406      | 24,750,832  | 1.376                         |
| Others                          | 184,317     | 37,754,227  | 2.098                         |
|                                 | 995,650     | 263,513,707 | 14.646                        |
| <b>SINEs</b>                    |             |             |                               |
| SINE-2                          | 344,568     | 71,189,836  | 3.957                         |
| Others                          | 9,136       | 1,110,966   | 0.062                         |
|                                 | 353,704     | 72,300,802  | 4.019                         |
| <b>DNA transposons</b>          |             |             |                               |
| hAT                             | 526,130     | 77,476,809  | 4.307                         |
| Mariner                         | 409,901     | 67,917,600  | 3.775                         |
| Helitron                        | 179,050     | 35,682,369  | 1.983                         |
| DNA                             | 300,556     | 39,263,225  | 2.182                         |
| Others                          | 112,203     | 10,576,832  | 0.588                         |
|                                 | 1,527,840   | 230,916,835 | 12.835                        |
| <b>LTR</b>                      |             |             |                               |
| Gypsy                           | 241,711     | 67,543,777  | 3.754                         |
| Copia                           | 53,434      | 8,461,466   | 0.470                         |
| DIRS                            | 24,293      | 9,446,400   | 0.525                         |
| Others                          | 43,490      | 9,248,301   | 0.514                         |
|                                 | 362,928     | 94,699,944  | 5.263                         |
| <b>ERVs</b>                     |             |             |                               |
| ERV1/2/3                        | 79,860      | 12,977,630  | 0.720                         |
| <b>SSR</b>                      |             |             |                               |
| Others                          | 72,160      | 8,040,704   | 0.447                         |
|                                 | 250,255     | 19,205,549  | 1.067                         |
| <b>Well-annotated</b>           | 3,642,397   | 701,655,171 | 38.997                        |
| <b>Unknown</b>                  | 1,678,936   | 216,304,228 | 12.022                        |
| <b>Total</b>                    | 5,321,333   | 917,959,399 | 51.019                        |
