# Supplementary material for: Superior ab initio identification, annotation and characterisation of TEs and segmental duplications from genome assemblies
Source: PubMed Central journal article supplement (PMC5851578; doi:10.1371/journal.pone.0193588), 2018-03-14
Supplement: pone.0193588.s013.pdf [file pone.0193588.s013.pdf]

| Group                           | Copy number | Total bp    | Percentage coverage of genome |
|---------------------------------|-------------|-------------|-------------------------------|
| <b>Non-LTR retrotransposons</b> |             |             |                               |
| <b>LINEs</b>                    |             |             |                               |
| LINE-2                          | 229,080     | 40,358,815  | 2.351                         |
| RTE(BovB)                       | 222,363     | 57,590,102  | 3.355                         |
| RTE                             | 124,644     | 26,011,403  | 1.515                         |
| LINE(CR1)                       | 194,333     | 35,912,124  | 2.092                         |
| LINE-1                          | 126,975     | 15,181,332  | 0.884                         |
| Penelope                        | 95,133      | 11,527,155  | 0.671                         |
| Other                           | 96,331      | 12,761,752  | 0.744                         |
|                                 | 1,088,859   | 199,342,683 | 11.612                        |
| <b>SINEs</b>                    |             |             |                               |
| SINE-2                          | 206,966     | 28,277,402  | 1.647                         |
| Other                           | 17,391      | 1,252,811   | 0.073                         |
|                                 | 224,357     | 29,530,213  | 1.720                         |
| <b>DNA transposons</b>          |             |             |                               |
| Mariner                         | 201,988     | 22,220,773  | 1.294                         |
| hAT                             | 260,256     | 23,832,751  | 1.388                         |
| others                          | 215,581     | 14,924,598  | 0.870                         |
|                                 | 677,825     | 60,978,122  | 3.552                         |
| <b>LTR</b>                      |             |             |                               |
| DIRS                            | 62,273      | 11,501,289  | 0.670                         |
| Gypsy                           | 207,875     | 15,163,491  | 0.883                         |
| Copia                           | 74,482      | 5,108,316   | 0.298                         |
| other                           | 45,829      | 2,782,279   | 0.162                         |
|                                 | 390,459     | 34,555,375  | 2.013                         |
| <b>ERVs</b>                     |             |             |                               |
| ERV1/2/3                        | 99,037      | 6,371,060   | 0.371                         |
| SSR                             | 83,878      | 8,278,572   | 0.482                         |
| Others                          | 217,184     | 15,519,668  | 0.905                         |
| <b>Well-annotated</b>           | 2,781,599   | 354,575,693 | 20.655                        |
| <b>Unknown</b>                  | 2,882,556   | 381,401,912 | 22.217                        |
| <b>Total</b>                    | 5,664,155   | 735,977,605 | 42.872                        |
