# Supplementary material for: Superior ab initio identification, annotation and characterisation of TEs and segmental duplications from genome assemblies
Source: PubMed Central journal article supplement (PMC5851578; doi:10.1371/journal.pone.0193588), 2018-03-14
Supplement: pone.0193588.s014.pdf [file pone.0193588.s014.pdf]

| Group                           | Copy number | Total bp      | Percentage coverage of genome |
|---------------------------------|-------------|---------------|-------------------------------|
| <b>Non-LTR retrotransposons</b> |             |               |                               |
| <b>LINES</b>                    |             |               |                               |
| LINE L2                         | 2,141,746   | 380,315,682   | 18.345                        |
| CR1                             | 105,713     | 16,510,780    | 0.796                         |
| BovB                            | 14,412      | 3,793,080     | 0.183                         |
| Others                          | 156,741     | 22,358,028    | 1.078                         |
|                                 | 2,418,612   | 422,977,570   | 20.402                        |
| <b>SINEs</b>                    |             |               |                               |
| Mon1                            | 2,039,591   | 376,397,912   | 18.156                        |
| PlatSINE                        | 49,237      | 11,920,732    | 0.575                         |
| Others                          | 152,447     | 16,041,435    | 0.774                         |
|                                 | 2,241,275   | 404,360,079   | 19.505                        |
| <b>DNA transposons</b>          |             |               |                               |
| hAT                             | 105,794     | 10,839,474    | 0.523                         |
| Mariner                         | 90,510      | 12,440,134    | 0.600                         |
| Others                          | 163,790     | 12,469,529    | 0.601                         |
|                                 | 360,094     | 35,749,137    | 1.724                         |
| <b>LTR</b>                      |             |               |                               |
| Copia                           | 35,510      | 2,515,002     | 0.121                         |
| Gypsy                           | 150,673     | 10,227,632    | 0.493                         |
| Other                           | 58,994      | 6,189,423     | 0.299                         |
|                                 | 245,177     | 18,932,057    | 0.913                         |
| <b>ERVs</b>                     |             |               |                               |
| ERV                             | 85,721      | 8,813,118     | 0.425                         |
| SSR                             | 107,515     | 13,599,686    | 0.656                         |
| Others                          | 364,116     | 46,404,979    | 2.238                         |
| <b>Well-annotated</b>           | 5,822,510   | 950,836,626   | 45.863                        |
| <b>Unknown</b>                  | 2,321,717   | 261,289,414   | 12.603                        |
| <b>Total</b>                    | 8,144,227   | 1,212,126,040 | 58.466                        |
