# Supplementary material for: Superior ab initio identification, annotation and characterisation of TEs and segmental duplications from genome assemblies
Source: PubMed Central journal article supplement (PMC5851578; doi:10.1371/journal.pone.0193588), 2018-03-14
Supplement: pone.0193588.s015.pdf [file pone.0193588.s015.pdf]

| Group                           | Copy number | Total bp      | Percentage coverage of genome |
|---------------------------------|-------------|---------------|-------------------------------|
| <b>Non-LTR retrotransposons</b> |             |               |                               |
| <b>LINEs</b>                    |             |               |                               |
| LINE L1                         | 1,252,041   | 703,738,862   | 19.518                        |
| CR1                             | 1,096,864   | 225,839,324   | 6.264                         |
| RTE                             | 220,608     | 73,141,920    | 2.028                         |
| LINE2                           | 50865       | 5042973       | 0.140                         |
| Others                          | 127,564     | 9,278,127     | 0.257                         |
|                                 | 2,747,942   | 1,017,041,206 | 28.206                        |
| <b>SINEs</b>                    |             |               |                               |
| SINE-1                          | 506,241     | 88,145,053    | 2.444                         |
| SINE MIR                        | 547,244     | 67,502,440    | 1.872                         |
| THER                            | 597,652     | 89,262,998    | 2.476                         |
| Others                          | 746,517     | 131,606,069   | 3.650                         |
|                                 | 2,397,654   | 376,516,560   | 10.442                        |
| <b>DNA transposons</b>          |             |               |                               |
| hAT                             | 350,343     | 44,822,893    | 1.243                         |
| Mariner                         | 157,450     | 23,453,500    | 0.651                         |
| Charlia                         | 17,487      | 4,683,795     | 0.130                         |
| Others                          | 439,658     | 37,393,312    | 1.037                         |
|                                 | 964,938     | 110,353,500   | 3.061                         |
| <b>LTR</b>                      |             |               |                               |
| Copia                           | 60,653      | 4,045,526     | 0.112                         |
| Gypsy                           | 289,603     | 20,968,390    | 0.582                         |
| Others                          | 100,662     | 9,982,015     | 0.277                         |
|                                 | 450,918     | 34,995,931    | 0.971                         |
| <b>ERVs</b>                     |             |               |                               |
| ERV                             | 772,823     | 347,807,695   | 9.646                         |
| SSR                             | 245,921     | 34,883,702    | 0.967                         |
| Others                          | 302,420     | 27,218,434    | 0.755                         |
| <b>Well-annotated</b>           | 7,882,616   | 1,948,817,028 | 54.049                        |
| <b>Unknown</b>                  | 1,164,500   | 141,831,766   | 3.934                         |
| <b>Total</b>                    | 9,047,116   | 2,090,648,794 | 57.983                        |
