# Supplementary material for: Superior ab initio identification, annotation and characterisation of TEs and segmental duplications from genome assemblies
Source: PubMed Central journal article supplement (PMC5851578; doi:10.1371/journal.pone.0193588), 2018-03-14
Supplement: pone.0193588.s016.pdf [file pone.0193588.s016.pdf]

| Group                           | Copy number | Total bp      | Percentage coverage of genome |
|---------------------------------|-------------|---------------|-------------------------------|
| <b>Non-LTR retrotransposons</b> |             |               |                               |
| <b>LINEs</b>                    |             |               |                               |
| LINE L1                         | 1,061,429   | 504,783,605   | 16.306                        |
| CR1                             | 348,909     | 65,998,881    | 2.132                         |
| LINE L2                         | 31,074      | 2,741,726     | 0.089                         |
| Others                          | 135,468     | 11,057,731    | 0.357                         |
|                                 | 1,576,880   | 584,581,943   | 18.884                        |
| <b>SINEs</b>                    |             |               |                               |
| <i>Alu</i>                      | 1,148,493   | 285,614,276   | 9.226                         |
| MIR                             | 367,336     | 49,924,630    | 1.613                         |
| Others                          | 91,907      | 12,580,275    | 0.406                         |
|                                 | 1,607,736   | 348,119,181   | 11.245                        |
| <b>DNA transposons</b>          |             |               |                               |
| hAT                             | 408,174     | 60,848,627    | 1.966                         |
| Mariner                         | 191,198     | 42,157,411    | 1.362                         |
| Others                          | 386,094     | 36,070,514    | 1.165                         |
|                                 | 985,466     | 13,907,6552   | 4.493                         |
| <b>LTR</b>                      |             |               |                               |
| Gypsy                           | 279,091     | 20,266,383    | 0.655                         |
| THE1                            | 10,979      | 11,686,418    | 0.377                         |
| Copia                           | 55,336      | 3,810,198     | 0.123                         |
| Others                          | 90,172      | 11,450,442    | 0.370                         |
|                                 | 435,578     | 47,213,441    | 1.525                         |
| <b>ERVs</b>                     |             |               |                               |
| ERV                             | 802,941     | 246,168,345   | 7.952                         |
| SSR                             | 147,561     | 18,249,839    | 0.590                         |
| Others                          | 294,098     | 34,097,043    | 1.101                         |
| <b>Well-annotated</b>           | 5,850,260   | 1,417,506,344 | 45.790                        |
| <b>Unknown</b>                  | 762,391     | 91,054,381    | 2.941                         |
| <b>Total</b>                    | 6,612,651   | 1,508,560,725 | 48.731                        |
