# Supplementary material for: Superior ab initio identification, annotation and characterisation of TEs and segmental duplications from genome assemblies
Source: PubMed Central journal article supplement (PMC5851578; doi:10.1371/journal.pone.0193588), 2018-03-14
Supplement: pone.0193588.s017.pdf [file pone.0193588.s017.pdf]

|                |                |           | Estimate | Std. Error | T      | Pr(> t ) | Significance |
|----------------|----------------|-----------|----------|------------|--------|----------|--------------|
| Chicken        | <i>de novo</i> | Intercept | -1.055   | 0.037      | -28.49 | <2e-16   | ***          |
|                |                | Length    | 0.689    | 0.013      | 53.44  | <2e-16   | ***          |
|                | RMD            | Intercept | -1.690   | 0.424      | -3.911 | 0.000148 | ***          |
|                |                | Length    | 1.226    | 0.160      | 7.653  | 4.18e-12 | ***          |
| Bearded Dragon | <i>de novo</i> | Intercept | -1.690   | 0.016      | -105.2 | <2e-16   | ***          |
|                |                | Length    | 1.035    | 0.006      | 164.5  | <2e-16   | ***          |
|                | RMD            | Intercept | 1.264    | 0.123      | 10.27  | <2e-16   | ***          |
|                |                | Length    | 0.713    | 0.053      | 13.54  | <2e-16   | ***          |
| Anolis         | <i>de novo</i> | Intercept | -1.822   | 0.030      | -60.40 | <2e-16   | ***          |
|                |                | Length    | 1.005    | 0.011      | 92.78  | <2e-16   | ***          |
|                | RMD            | Intercept | 1.147    | 0.178      | 6.435  | 1.75e-10 | ***          |
|                |                | Length    | 0.501    | 0.074      | 6.753  | 2.20e-11 | ***          |
| Platypus       | <i>de novo</i> | Intercept | -2.156   | 0.009      | -245.0 | <2e-16   | ***          |
|                |                | Length    | 1.098    | 0.003      | 360.7  | <2e-16   | ***          |
|                | RMD            | Intercept | -0.329   | 0.218      | -1.51  | 0.132    |              |
|                |                | Length    | 1.026    | 0.092      | 11.10  | <2e-16   | ***          |
| Opossum        | <i>de novo</i> | Intercept | -0.867   | 0.032      | -26.75 | <2e-16   | ***          |
|                |                | Length    | 0.700    | 0.011      | 61.49  | <2e-16   | ***          |
|                | RMD            | Intercept | -0.709   | 0.286      | -2.477 | 0.0135   | *            |
|                |                | Length    | 0.974    | 0.114      | 8.526  | <2e-16   | ***          |
| Human          | <i>de novo</i> | Intercept | -1.733   | 0.021      | -80.7  | <2e-16   | ***          |
|                |                | Length    | 1.047    | 0.008      | 135.1  | <2e-16   | ***          |
|                | RMD            | Intercept | -0.290   | 0.248      | -1.168 | 0.244    |              |
|                |                | Length    | 0.617    | 0.101      | 6.122  | 2.05e-09 | ***          |
